# Supplementary material
Source: ML conference proceedings conference paper supplement (https://openreview.net/forum?id=eV5YIrJPdy)
Supplement: supplementary_material [file attachment]

## Sheet: Counter
Language	Model	Bin1 Accuracy	Bin2 Accuracy	Bin3 Accuracy	Language Class
Dyck-1	Transformers	100	100	100	Dyck
Dyck-1	Mamba1	100	62.6	13.91	Dyck
Dyck-1	Mamba2	100	49.1	9.5	Dyck
Dyck-1	Mamba3	100	53.95	10	Dyck
Shuffle-2	Transformers	100	100	93	Shuffle
Shuffle-2	Mamba1	100	49.5	2.3	Shuffle
Shuffle-2	Mamba2	100	61.5	8.2	Shuffle
Shuffle-2	Mamba3	100	65.5	9.7	Shuffle
Shuffle-4	Transformers	100	100	98.8	Shuffle
Shuffle-4	Mamba1	100	44.4	4.3	Shuffle
Shuffle-4	Mamba2	100	63.8	7.2	Shuffle
Shuffle-4	Mamba3	100	56.2	7.8	Shuffle
Shuffle-6	Transformers	100	99.9	94	Shuffle
Shuffle-6	Mamba1	100	39.4	3.4	Shuffle
Shuffle-6	Mamba2	100	61.2	6.75	Shuffle
Shuffle-6	Mamba3	100	59.6	9.85	Shuffle
Boolean-3	Transformers	100	100	99.8	Boolean
Boolean-3	Mamba1	99.75	65.7	7.05	Boolean
Boolean-3	Mamba2	99.95	47.25	2.3	Boolean
Boolean-3	Mamba3	100	73.45	8.6	Boolean
Boolean-5	Transformers	100	99.8	99	Boolean
Boolean-5	Mamba1	99.9	30.05	7.6	Boolean
Boolean-5	Mamba2	100	80.2	14.9	Boolean
Boolean-5	Mamba3	99.25	60.7	6.25	Boolean
\(a^nb^n\)	Transformers	100	100	100	\(a^nb^n
\(a^nb^n\)	Mamba1	100	4.1	0	\(a^nb^n
\(a^nb^n\)	Mamba2	100	9.4	0	\(a^nb^n
\(a^nb^n\)	Mamba3	100	21.3	0	\(a^nb^n
\(a^nb^nc^n\)	Transformers	100	100	100	\(a^nb^n
\(a^nb^nc^n\)	Mamba1	100	0	0	\(a^nb^n
\(a^nb^nc^n\)	Mamba2	100	7.6	0	\(a^nb^n
\(a^nb^nc^n\)	Mamba3	100	5.1	0	\(a^nb^n
\(a^nb^nc^nd^n\)	Transformers	100	100	99.4	\(a^nb^n
\(a^nb^nc^nd^n\)	Mamba1	100	4.76	0	\(a^nb^n
\(a^nb^nc^nd^n\)	Mamba2	100	0	0	\(a^nb^n
\(a^nb^nc^nd^n\)	Mamba3	100	0	0	\(a^nb^n

## Sheet: Regular1
Language	Model	Bin1 Accuracy	Bin2 Accuracy
Tomita 1	Transformer(pos mask)	100	100
Tomita 1	Mamba1	100	100
Tomita 1	Mamba2	100	100
Tomita 1	Mamba3	100	100
Tomita 4	Transformer(pos enc)	100	92.4
Tomita 4	Mamba1	100	100
Tomita 4	Mamba2	100	100
Tomita 4	Mamba3	100	100
Tomita 7	Transformer(pos mask)	100	100
Tomita 7	Mamba1	100	100
Tomita 7	Mamba2	100	100
Tomita 7	Mamba3	100	100
Tomita 2	Transformer	100	100
Tomita 2	Mamba1	100	100
Tomita 2	Mamba2	100	100
Tomita 2	Mamba3	100	100
\(aa^*bb^*cc^*dd^*ee^*\)	Transformer(pos mask)	100	100
\(aa^*bb^*cc^*dd^*ee^*\)	Mamba1	100	100
\(aa^*bb^*cc^*dd^*ee^*\)	Mamba2	100	100
\(aa^*bb^*cc^*dd^*ee^*\)	Mamba3	100	100
\(\{a, b\}^*d\{b,c\}^*\)	Transformer(pos mask)	100	100
\(\{a, b\}^*d\{b,c\}^*\)	Mamba1	100	100
\(\{a, b\}^*d\{b,c\}^*\)	Mamba2	100	100
\(\{a, b\}^*d\{b,c\}^*\)	Mamba3	100	100
\(\{0, 1, 2\}^*02^*\)	Transformer	100	68.7
\(\{0, 1, 2\}^*02^*\)	Mamba1	100	100
\(\{0, 1, 2\}^*02^*\)	Mamba2	100	100
\(\{0, 1, 2\}^*02^*\)	Mamba3	100	100
\(D_2\)	Transformer(pos mask)	74.6	3.1
\(D_2\)	Mamba1	100	100
\(D_2\)	Mamba2	100	100
\(D_2\)	Mamba3	100	100
\(D_3\)	Transformer(pos mask)	80.9	8.5
\(D_3\)	Mamba1	100	100
\(D_3\)	Mamba2	100	100
\(D_3\)	Mamba3	100	100
\(D_4\)	Transformer(pos mask)	90.2	3.3
\(D_4\)	Mamba1	100	100
\(D_4\)	Mamba2	100	100
\(D_4\)	Mamba3	100	100
\(D_{12}\)	Transformer(pos mask)	95.18	1.5
\(D_{12}\)	Mamba1	93.65	93.35
\(D_{12}\)	Mamba2	99.9	95.55
\(D_{12}\)	Mamba3	99.99	99.85

## Sheet: Regular2
Language	Model	Bin1 Accuracy	Bin2 Accuracy
Parity	Transformer(pos mask)	68.7	0
Parity	Mamba1	26.95	0
Parity	Mamba2	80.05	4.15
Parity	Mamba3	91.15	16.7
(aa)*	Transformer(pos mask)	100	0
(aa)*	Mamba1	2.1	0
(aa)*	Mamba2	2.1	0
(aa)*	Mamba3	4.2	0
(aaaa)*	Transformer(pos mask)	100	0
(aaaa)*	Mamba1	0	0
(aaaa)*	Mamba2	0	0
(aaaa)*	Mamba3	4	0
(abab)*	Transformer(pos mask)	100	2.5
(abab)*	Mamba1	0	0
(abab)*	Mamba2	0	0
(abab)*	Mamba3	0	0
Tomita 3	Transformer(pos mask)	75.4	10.8
Tomita 3	Mamba1	25.99	12.49
Tomita 3	Mamba2	36.88	17.05
Tomita 3	Mamba3	60.85	29.37
Tomita 5	Transformer(pos mask)	29.3	0
Tomita 5	Mamba1	15.94	0
Tomita 5	Mamba2	34.5	0
Tomita 5	Mamba3	38.4	0
Tomita 6	Transformer(pos enc)	88.8	0
Tomita 6	Mamba1	7.2	0
Tomita 6	Mamba2	37.8	0
Tomita 6	Mamba3	54.56	0.04
