# Supplementary material
Source: ML conference proceedings conference paper supplement (https://openreview.net/forum?id=eV5YIrJPdy)

Mamba SSM Layer 1 vs Layer 2  
(Dyck-(8, 10), Test)

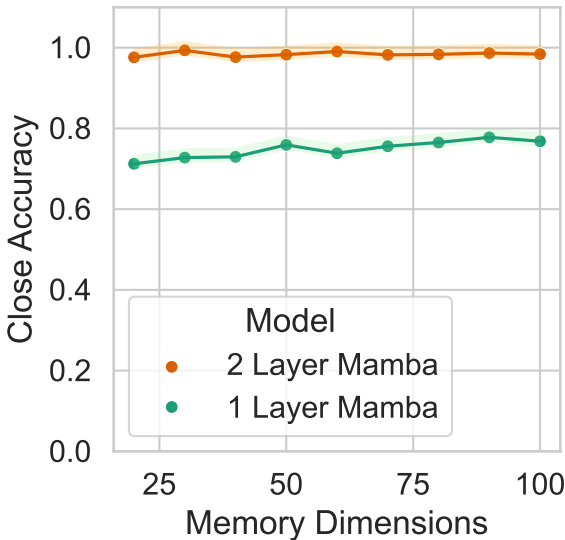

Supplement: supplementary_material [file attachment]

# 1 Layer Mamba SSM Flip Flop Validation Set Performance

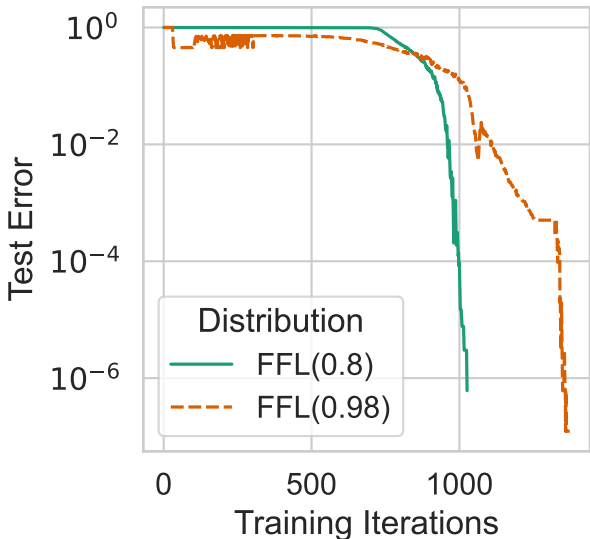

Supplement: supplementary_material [file attachment]

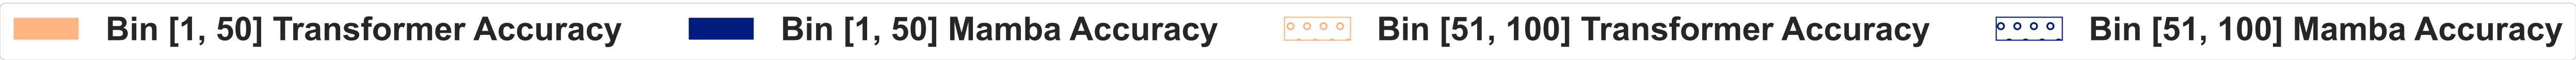

Star-Free Languages

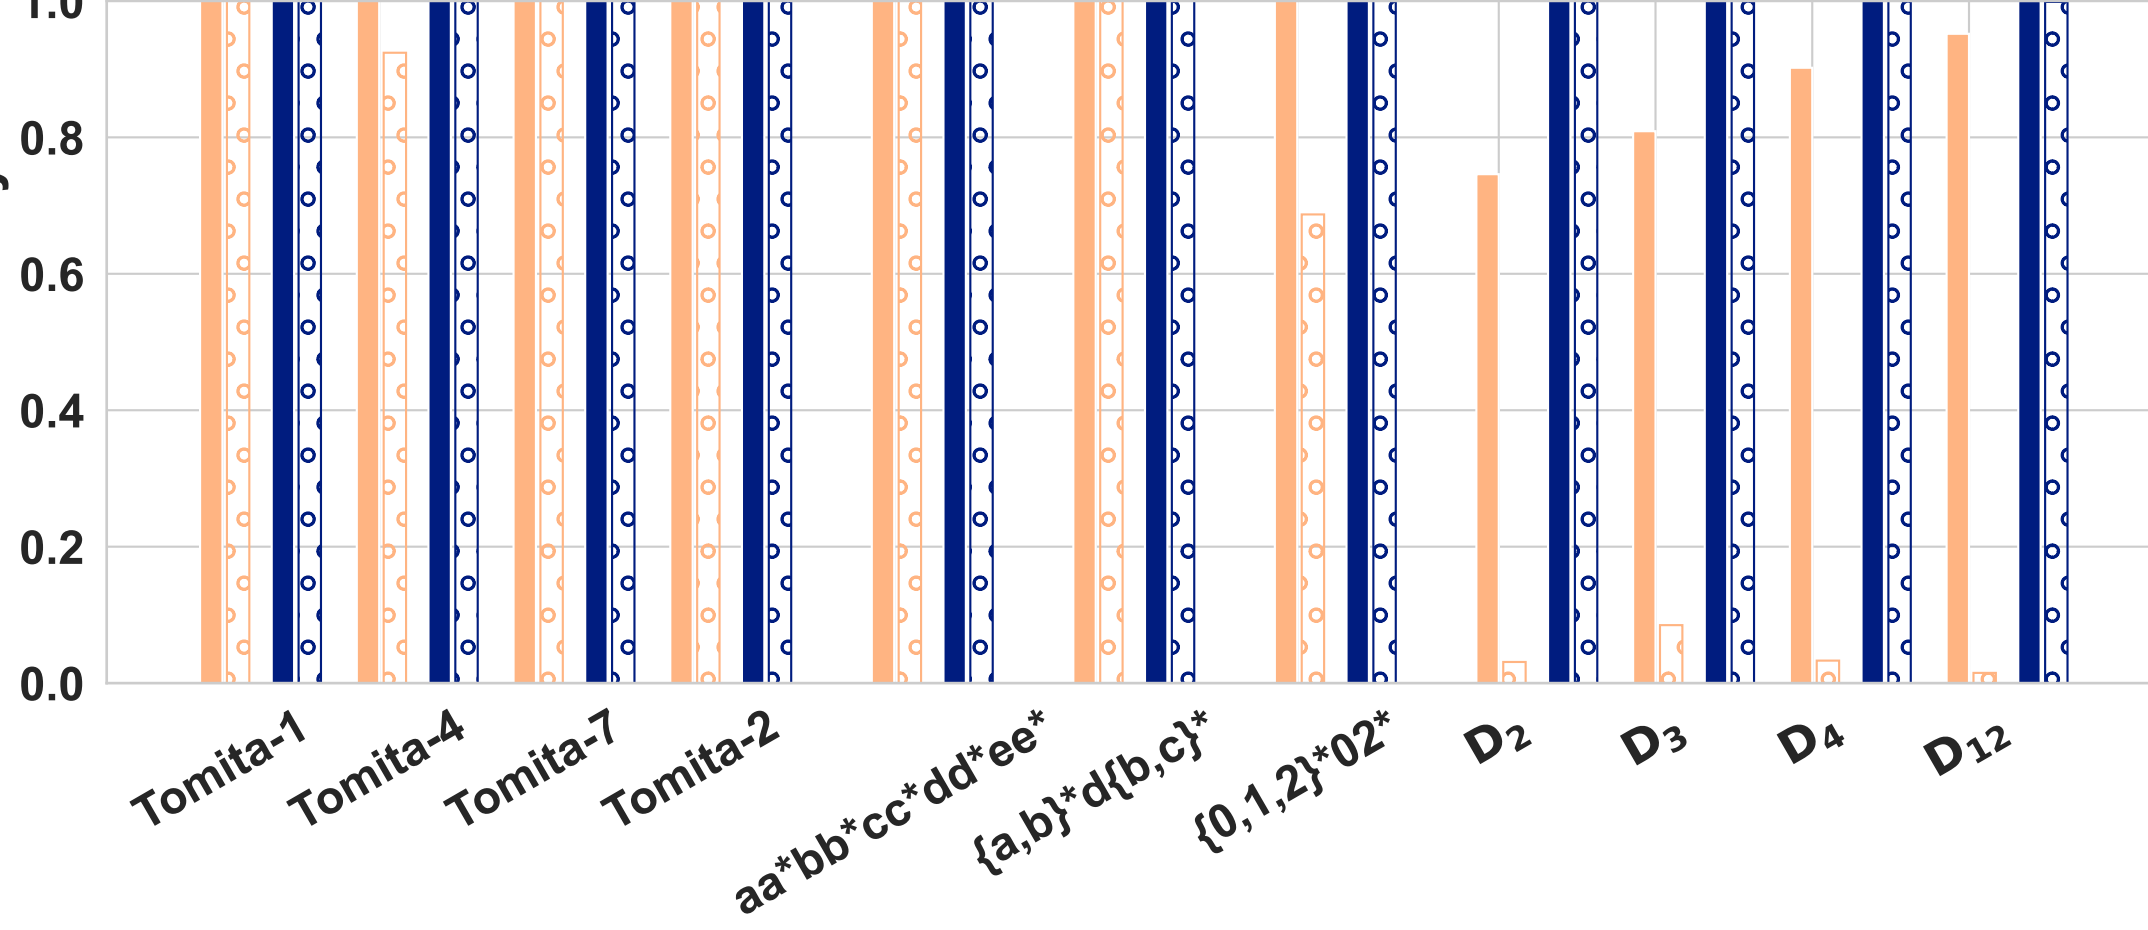

Non Star-Free Languages

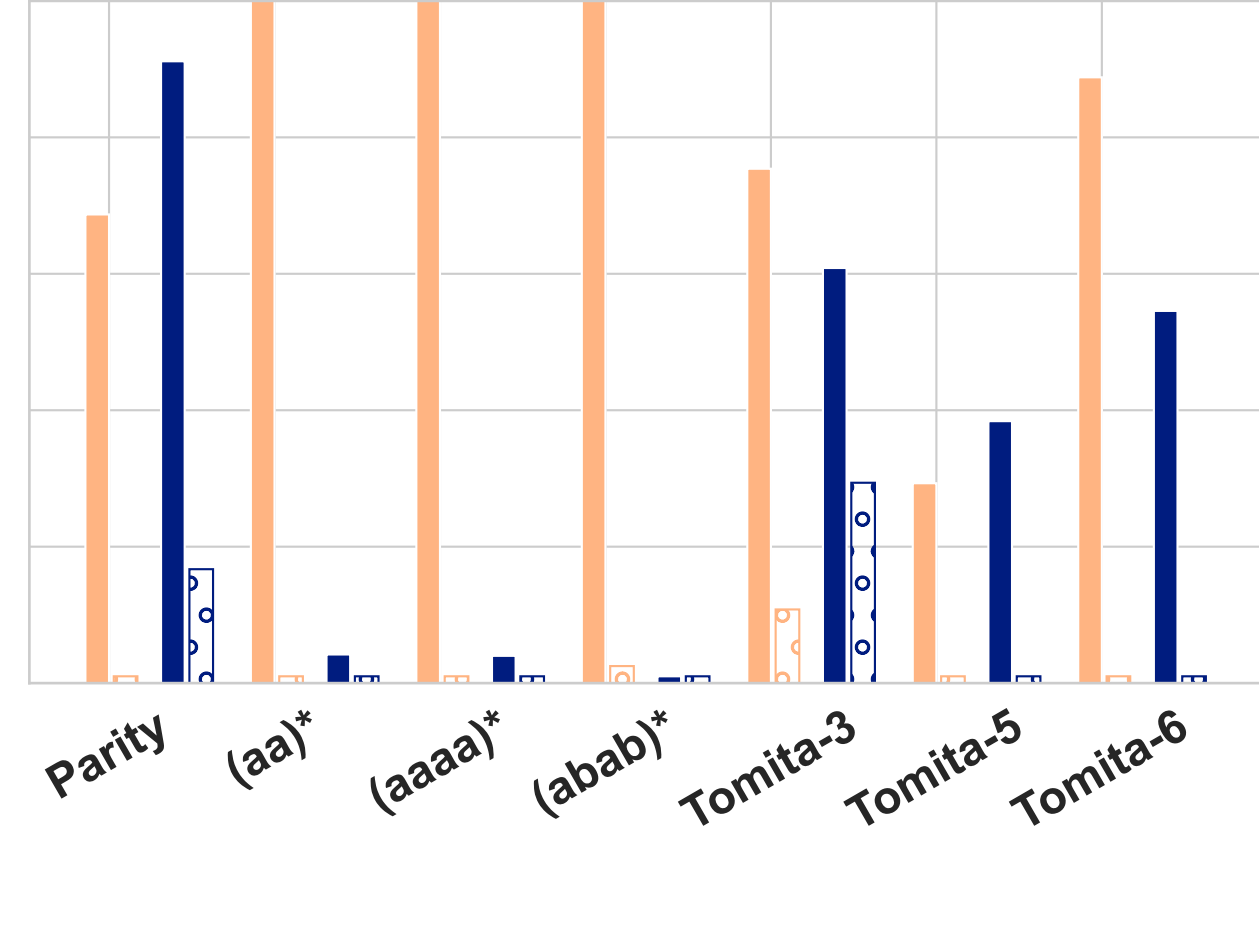

Counter Languages

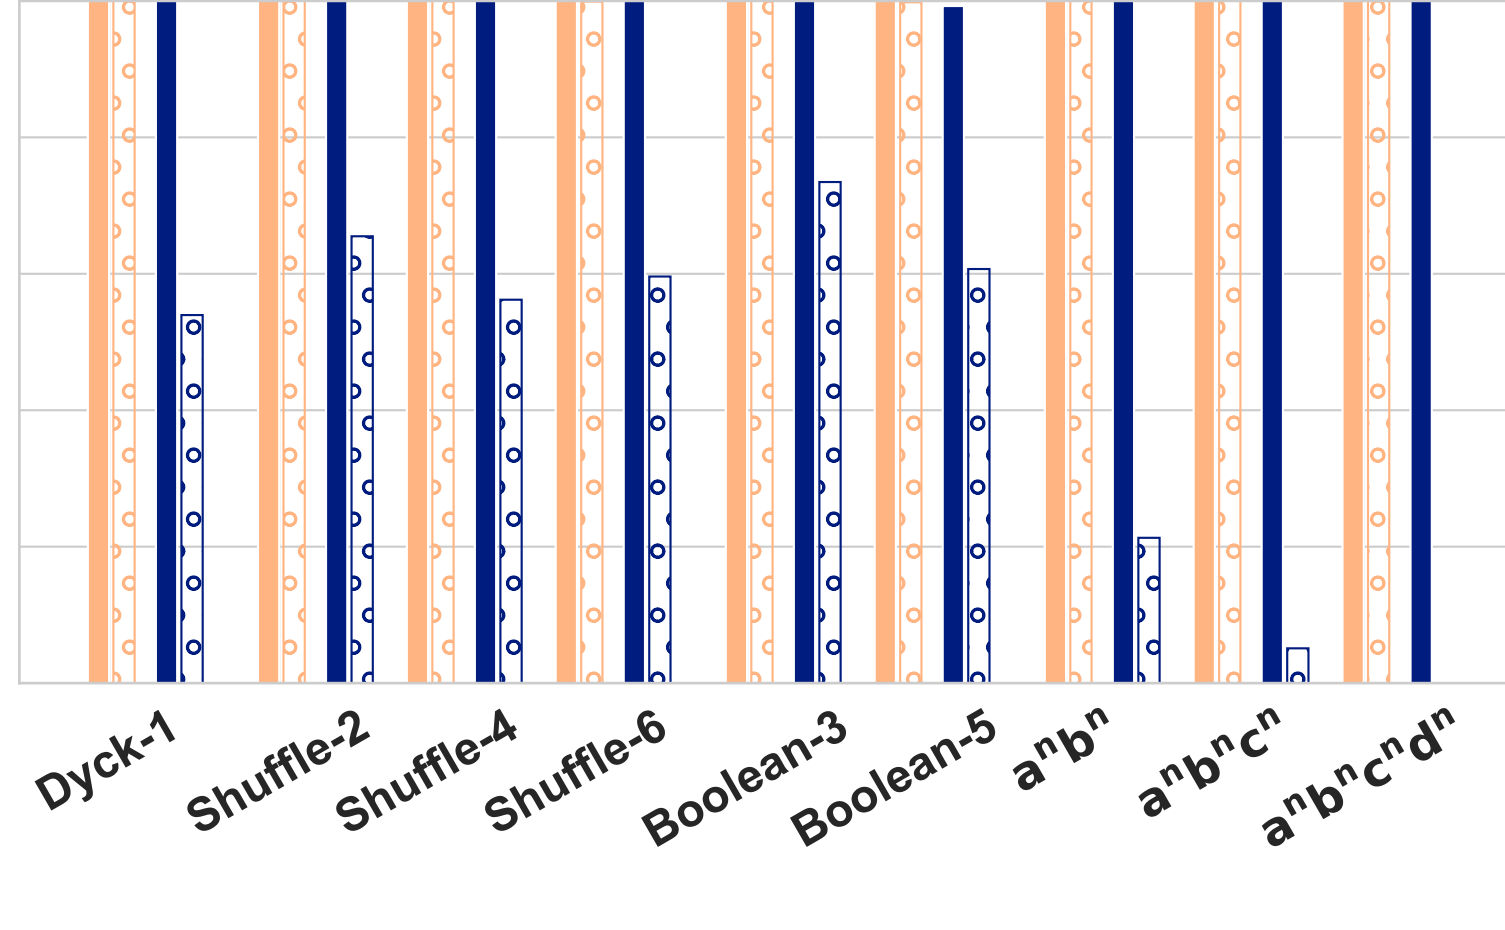

Supplement: supplementary_material [file attachment]

Mamba SSM Layer 1 vs Layer 2  
(Dyck-(8, 10), Validation)

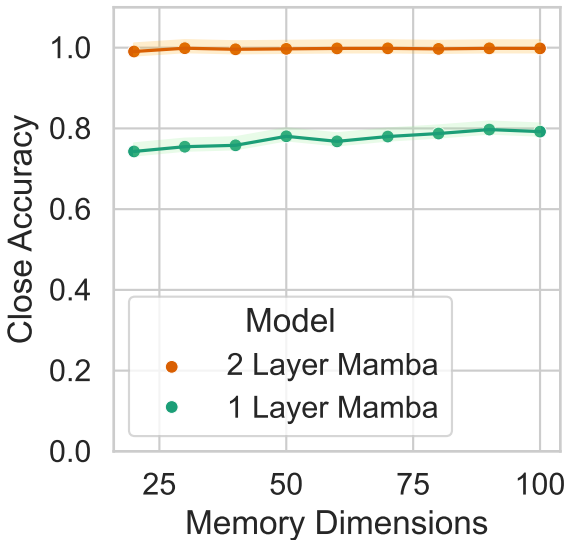

Supplement: supplementary_material [file attachment]
